# Supplementary material
Source: Springer Nature journal article supplement (https://www.springermedizin.de/resource/supplementary/12879_2011_1431_MOESM3_ESM.pdf/9443218)
Supplement: MOESM3 [file 9443218]

Treatment

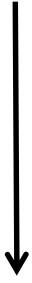

**HELMINTH**  
acute, chronic infection

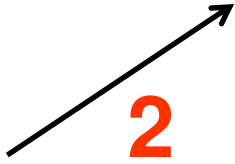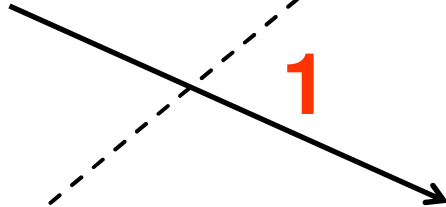

**IMMUNE RESPONSES**

Innate, Adaptive

**4**

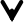

**3**

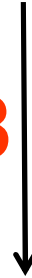

**5**

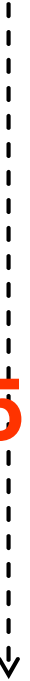

**ATOPY/ALLERGY**

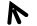

**6**

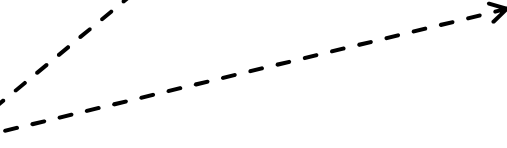

hygiene, geographic location,  
socio-economic and others factors
